# Supplementary material for: 3D-printed biomimetic scaffolds loaded with ADSCs and BMP-2 for enhanced rotator cuff repair
Source: Royal Society of Chemistry journal article supplement (doi:10.1039/d4tb01073f), 2024-01-01
Supplement: d4tb01073f1.pdf [file d4tb01073f1.pdf]

## Supporting Information

### 3D-Printed Biomimetic Scaffold Loaded with ADSCs and BMP-2 for Enhanced Rotator Cuff Repair

Zhonglian Wu<sup>a,b,c</sup> #, Jian Yang<sup>b,d</sup> #, Hui Chong<sup>a,e</sup> \*, Xiaomei Dai<sup>b</sup>, Haidu Sun<sup>a</sup>, Junli Shi<sup>a</sup>, Meijuan Yuan<sup>b</sup>, Dianwei Liu<sup>b,f</sup>, Mengbo Dang<sup>b,f</sup>, Hang Yao<sup>a,c</sup> \*, Wenyong Fei<sup>b,c</sup> \*

<sup>a</sup> School of Chemistry and Chemical Engineering, Yangzhou University, Yangzhou 225009, PR China.

<sup>b</sup> Department of Orthopedics and Sports Medicine, Northern Jiangsu People's Hospital Affiliated to Yangzhou University/Clinical Medical College, Yangzhou University Yangzhou 225001, P R. China.

<sup>c</sup> Basic and Clinical Research Center for Sports Medicine, Yangzhou University Yangzhou 225002, PR China.

<sup>d</sup> Medical College, Yangzhou University, Yangzhou 225001, PR China.

<sup>e</sup> Institute of Innovation Materials and Energy, Yangzhou University, Yangzhou 225002, China.

<sup>f</sup> Dalian Medical University, Dalian 116044, PR China.

# The authors contributed equally to this work.

\* Co-Corresponding Authors.

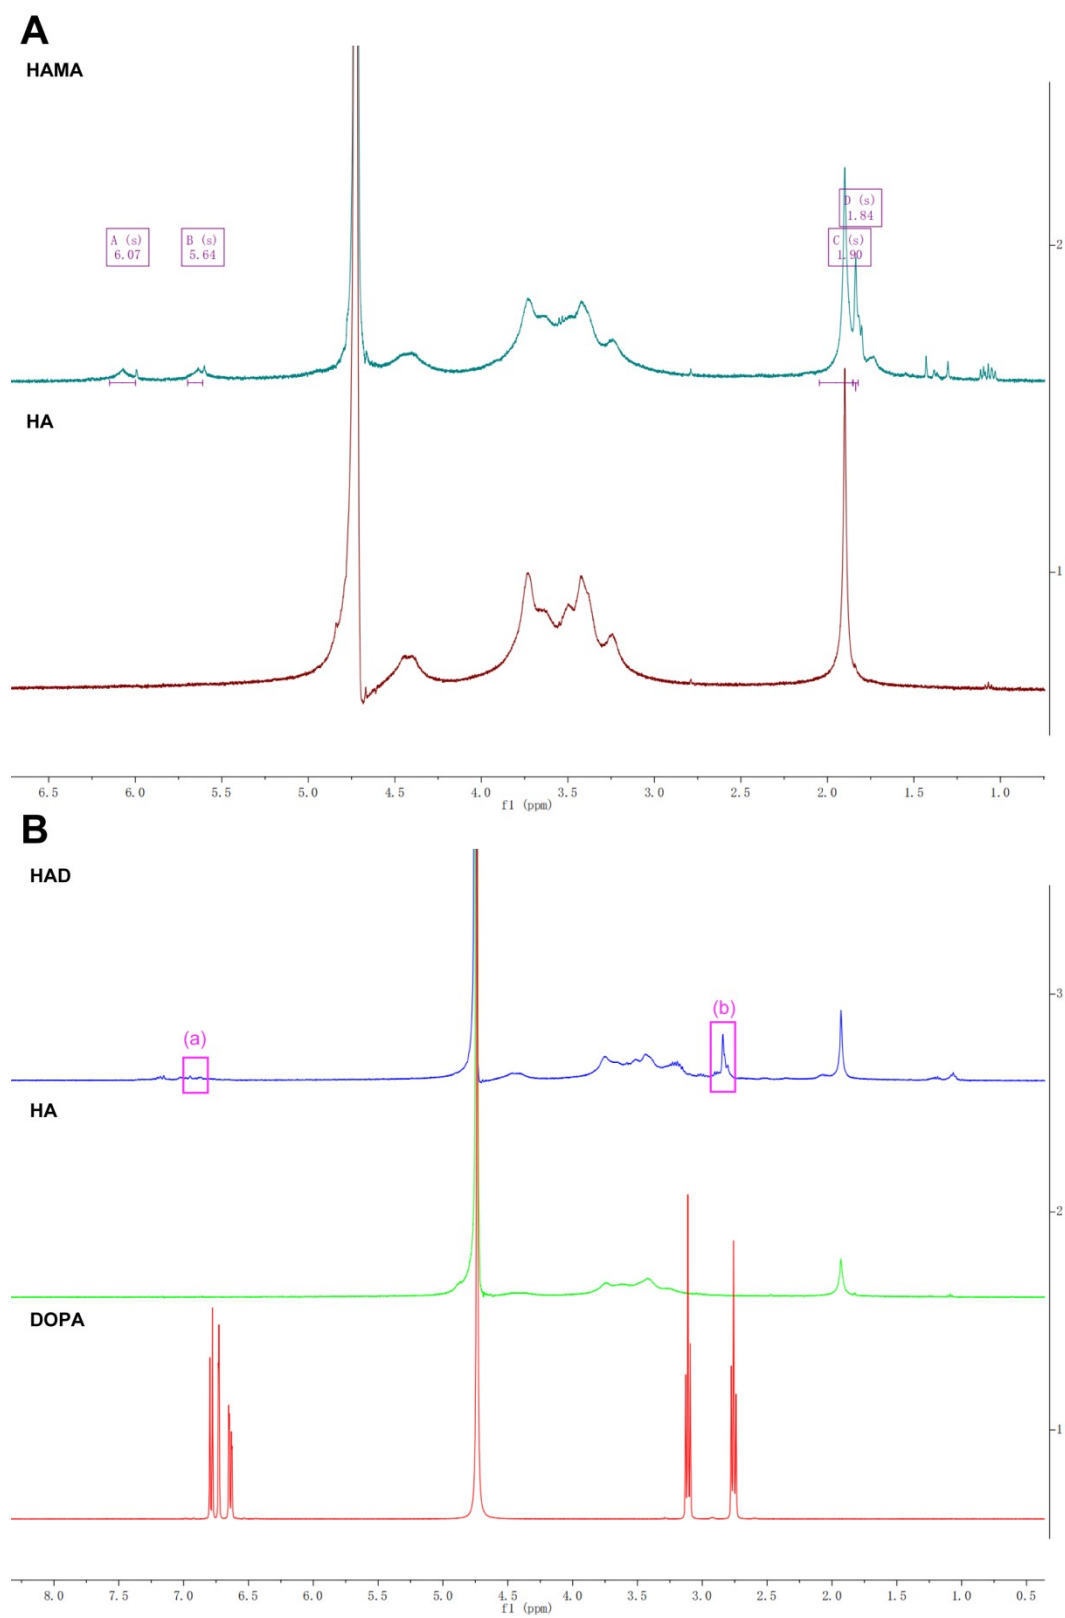

**Fig. S1.** (A)  $^1\text{H-NMR}$  analysis of the HAMA. (B)  $^1\text{H-NMR}$  analysis of the HAD.

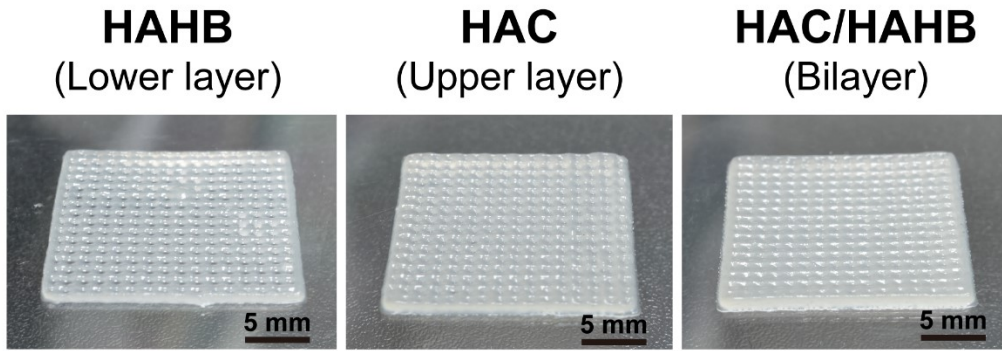

**Fig. S2** The macrophotograph of the HAHB (lower layer), HAC (upper layer), and HAC/HAHB (bilayer) scaffold.

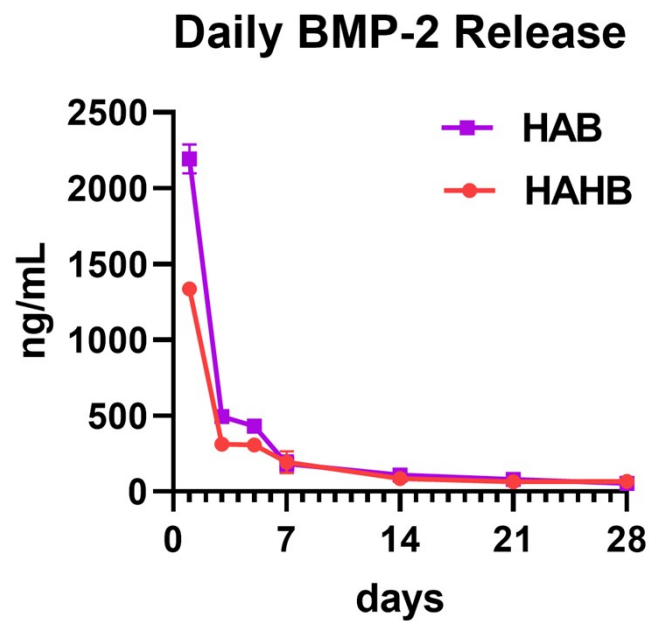

**Fig. S3.** BMP-2 daily release curves of hydrogel scaffolds within 28 days.

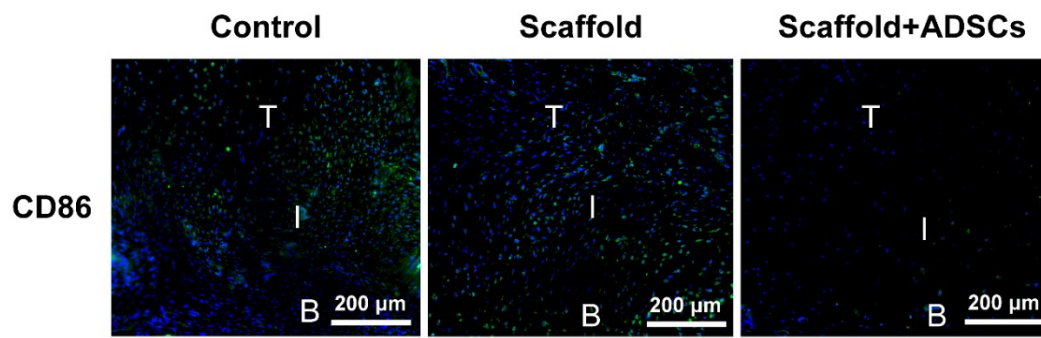

**Fig.S4.** Immunofluorescence staining of type 1 macrophage (CD 86 green) and DAPI (blue) was utilized to assess the inflammation phenomenon at 4 weeks.

**Table S1.** Primer sequences of genes.

| Gene   | Primers                     |                        |
|--------|-----------------------------|------------------------|
|        | Forward (5'-3')             | Reverse (5'-3')        |
| GAPDH  | AAGAAACCCTGGACCACCCAGC      | TGGTATTCGAGAGAAGGGAGGG |
| TNMD   | CCATGCTGGATGAGAGAGGTTA<br>C | CACAGACCCTGCGGCAGTA    |
| SCX    | AGAACACCCAGCCCAAACA         | CGGTCTTTGCTCAACTTTCT   |
| SOX9   | CTCTCCTAACGCCATCTTCAAG      | ACGTCTGTTTTGGGAGTGG    |
| COL2A1 | GACCTGCCGGTGAACAAG          | GGTACCAGGTTCTCCATCTCT  |
| OPN    | TTGGCTTTGCAGTCTCTGCGG       | AGGCAAGGCCGAACAGGCAAA  |
| OCN    | CAGTAAGGTGGTGAATAGACT       | GGTGCCATAGATGCGCTTG    |

**Table S2.** The results of swelling, degradation, and mechanical properties.

| Group                                  | HA                | HAC<br>Upper layer | HAHB<br>Lower layer | HAC/HAHB<br>Bilayer |
|----------------------------------------|-------------------|--------------------|---------------------|---------------------|
| Swelling<br>properties<br>(24h)        | 416.0±17.5%       | 1090.3±13.4%       | 662.0±53.7%         | 757.0 ± 104.8%      |
| mechanical<br>properties               | 40.4±20.68<br>kPa | 157.5±17.17 kPa    | 208.36±19.58<br>kPa | 178.83±55.64 kPa    |
| degradation<br>properties<br>(28 days) | 40.62± 4.55%      | 32.62± 3.81%       | 38.00 ± 3.72%       | 31.02 ± 4.18%       |

**Table S3.** Histological examination scores.

| Parameter                       | Scores        |                             |                               |                              |
|---------------------------------|---------------|-----------------------------|-------------------------------|------------------------------|
|                                 | 0             | 1                           | 2                             | 3                            |
| Cell<br>morphology              | Spindle       | Slightly rounded            | Moderately rounded            | Severely rounded             |
| Cellularity<br>vascularity ( %) | Normal<br><10 | Slightly increased<br>10-20 | Moderately increased<br>20-30 | Severely<br>increased<br>>30 |

**Table S4.** Semi-quantitative data from histological staining and immunohistochemical staining.

| <b>Group</b>                                                                                                 | <b>Control</b>                            | <b>Scaffold</b>                        | <b>Scaffold+ ADSCs</b>                 |
|--------------------------------------------------------------------------------------------------------------|-------------------------------------------|----------------------------------------|----------------------------------------|
| Histologic score<br>( <i>HE</i> )                                                                            | 7.33 ± 0.58 points<br>(4W)                | 5.67 ± 0.58 points<br>(4W)             | 4.33 ± 0.58 points<br>(4W)             |
|                                                                                                              | 5.67 ± 0.58 points<br>(8W)                | 3.33 ± 0.58 points<br>(8W)             | 2.67 ± 0.58 points<br>(8W)             |
| Semi-quantification of<br>metachromasia area<br><i>Safranin O-Fast Green</i><br>( <i>SO-FG</i> ) staining    | 11638.3±223.9 μm <sup>2</sup><br>(4W)     | 55998.3±4797.4 μm <sup>2</sup><br>(4W) | 69627.7±372.1 μm <sup>2</sup><br>(4W)  |
|                                                                                                              | 48466.3±821.9μm <sup>2</sup><br>(8W)      | 87658.0±821.9μm <sup>2</sup><br>(8W)   | 103572.7±4408.7μm <sup>2</sup><br>(8W) |
| Semi-quantification of<br>Collagen I content<br><i>Sirius Red (SR)</i><br>staining                           | 2.5 ± 0.4%<br>(4W)                        | 15.1 ± 0.4%<br>(4W)                    | 16.2 ± 0.6%<br>(4W)                    |
|                                                                                                              | 13.3 ± 0.7%<br>(8W)                       | 17.2 ± 0.8%<br>(8W)                    | 20.5 ± 1.30%<br>(8W)                   |
| Semi-quantification of<br>COL I expression                                                                   | 11643.7±445.4μm <sup>2</sup><br>(4W)      | 18833.7±1180.8 μm <sup>2</sup><br>(4W) | 25874.7±567.5μm <sup>2</sup><br>(4W)   |
| Immunohistochemistry<br>staining (IHC)<br>COL I                                                              | 20049.7±363.2μm <sup>2</sup><br>(8W)      | 31191.0±1172.9 μm <sup>2</sup><br>(8W) | 35998.0±2678.5 μm <sup>2</sup><br>(8W) |
| Semi-quantification of<br>COL I expression<br><i>Immunohistochemistry</i><br>staining (IHC)<br><i>COL II</i> | 7407.3±498.3μm <sup>2</sup><br>(4W)       | 10884.7±1336.4μm <sup>2</sup><br>(4W)  | 21565.7±1702.8μm <sup>2</sup><br>(4W)  |
|                                                                                                              | 18541.3±1142.8<br>μm <sup>2</sup><br>(8W) | 30905.0±1049.8 μm <sup>2</sup><br>(8W) | 36555.3±1131.0 μm <sup>2</sup><br>(8W) |
